# Supplementary material
Source: Springer Nature journal article supplement (https://www.springermedizin.de/resource/supplementary/12936_2008_698_MOESM6_ESM.pdf/9548026)

# Relative Intensities and Allelic Discrimination: Assay 1 - 4

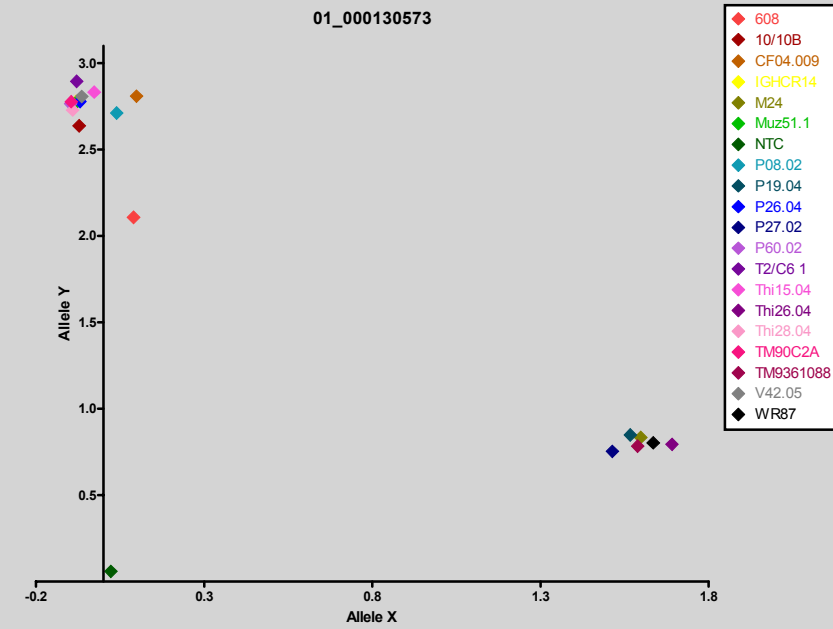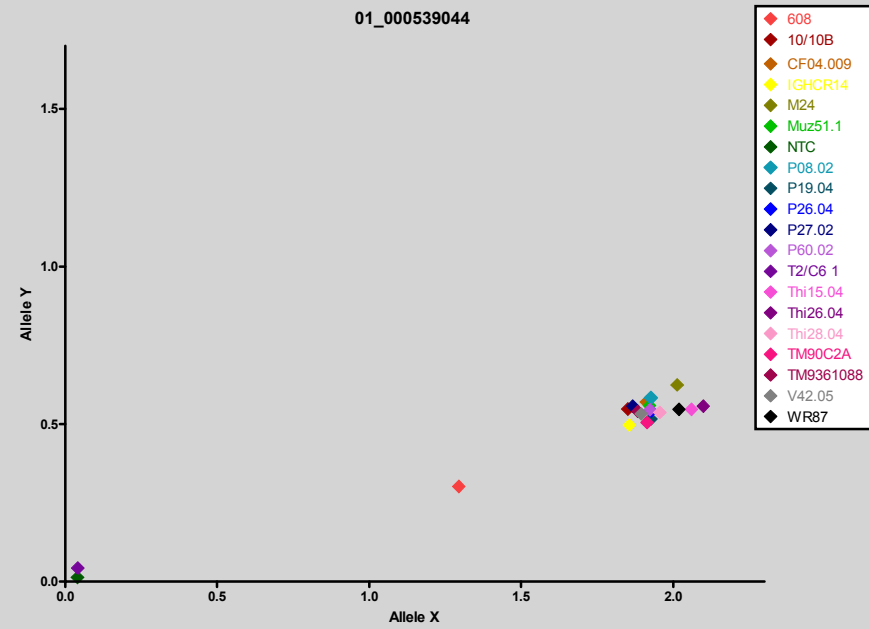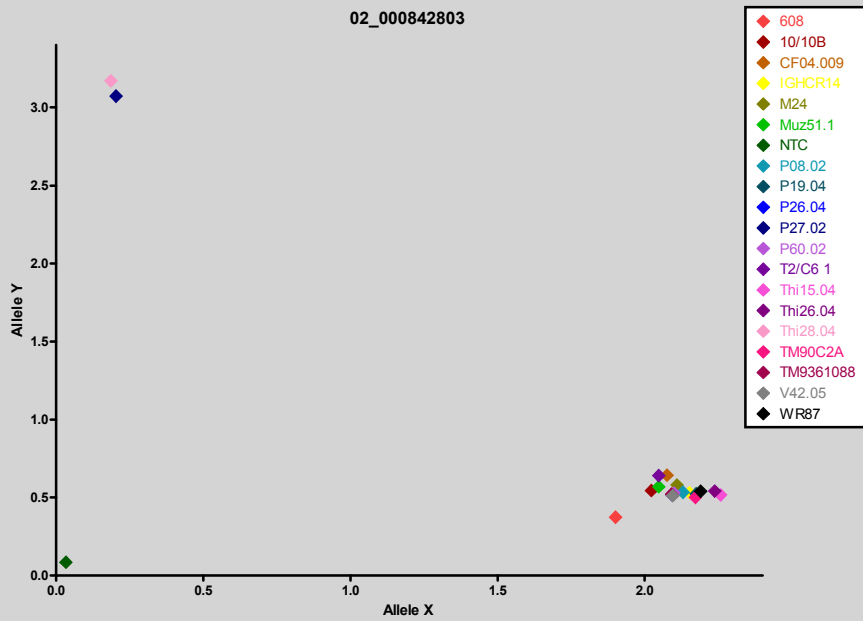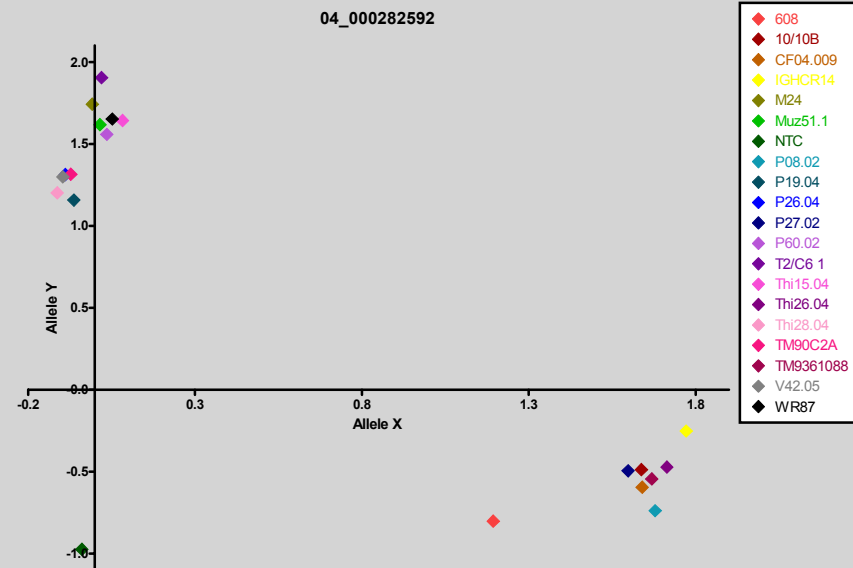

# Relative Intensities and Allelic Discrimination: Assay 5-8

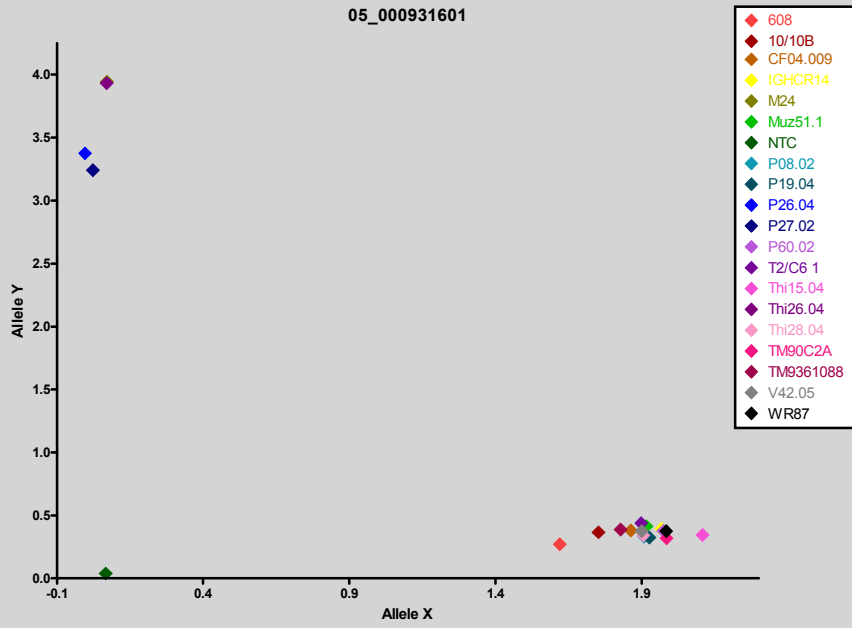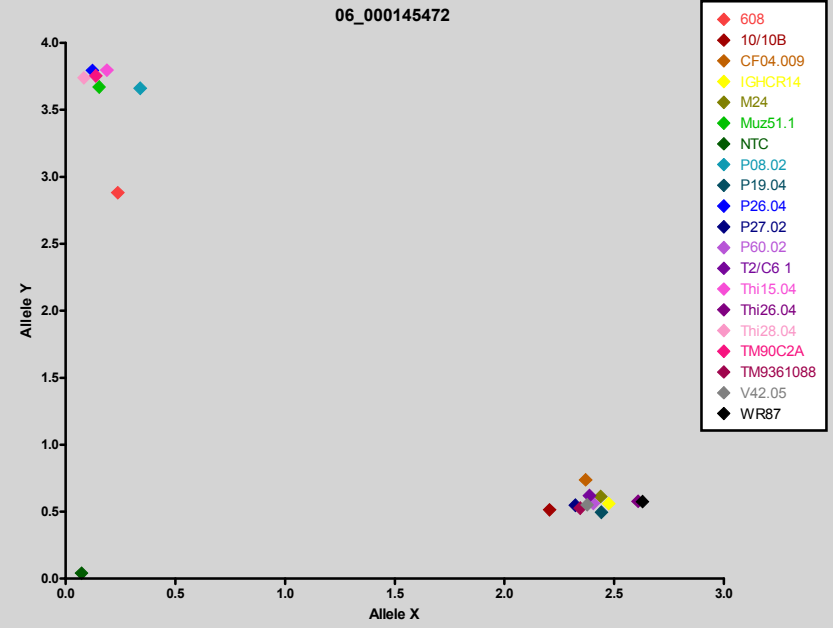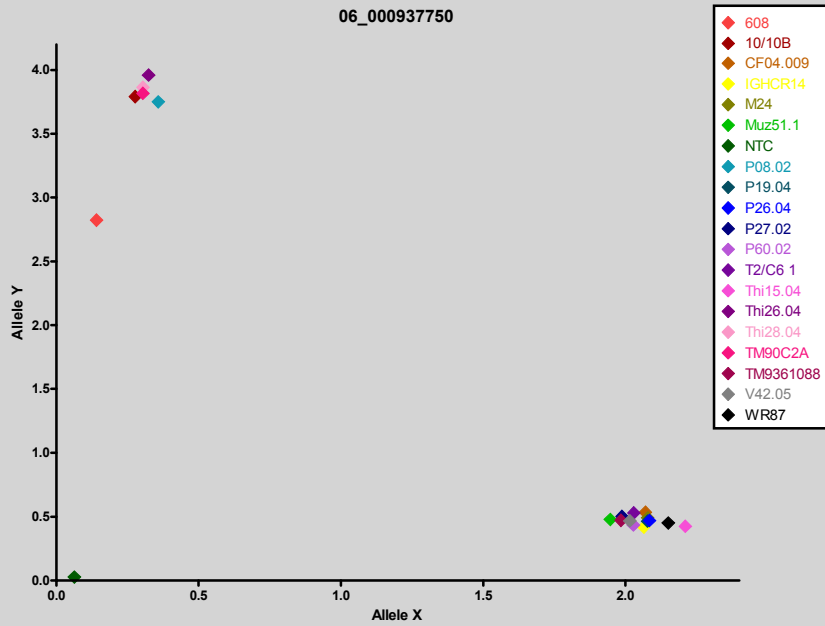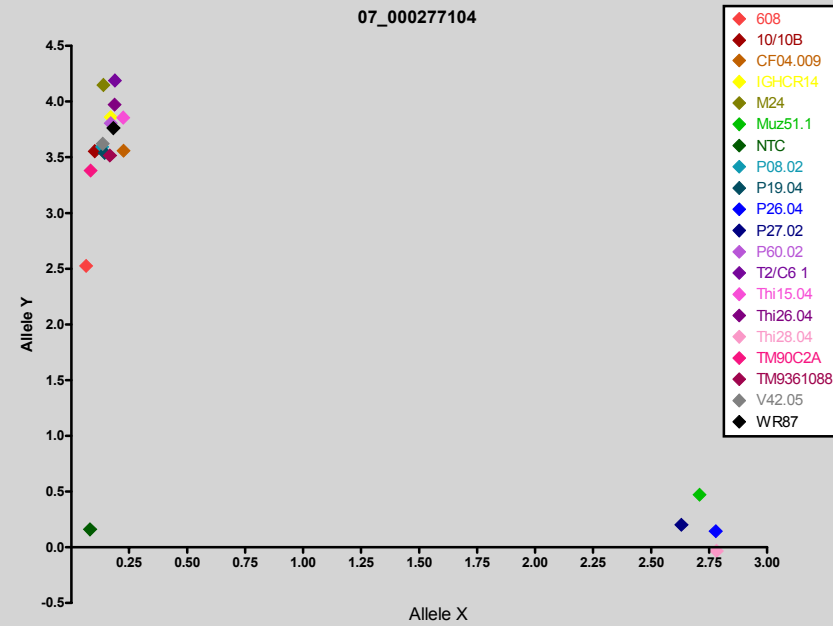

# Relative Intensities and Allelic Discrimination: Assay 9 - 12

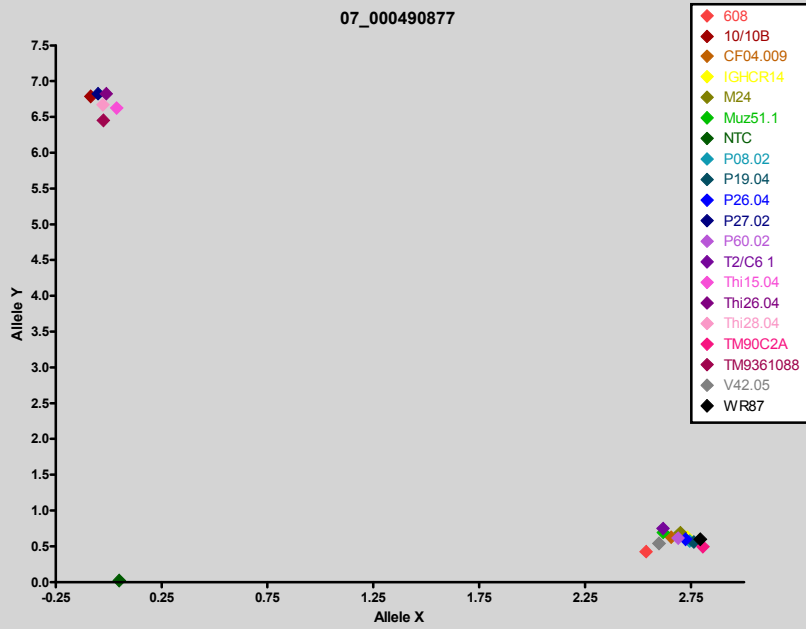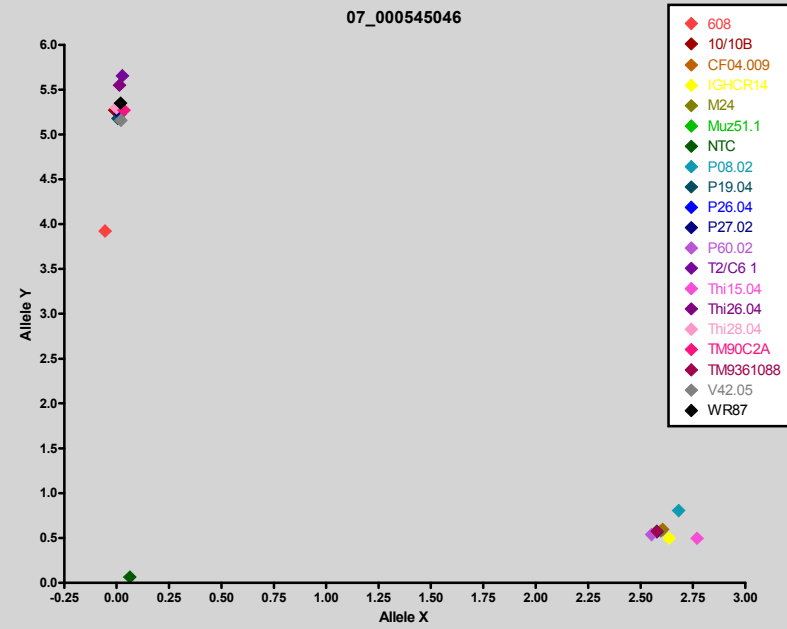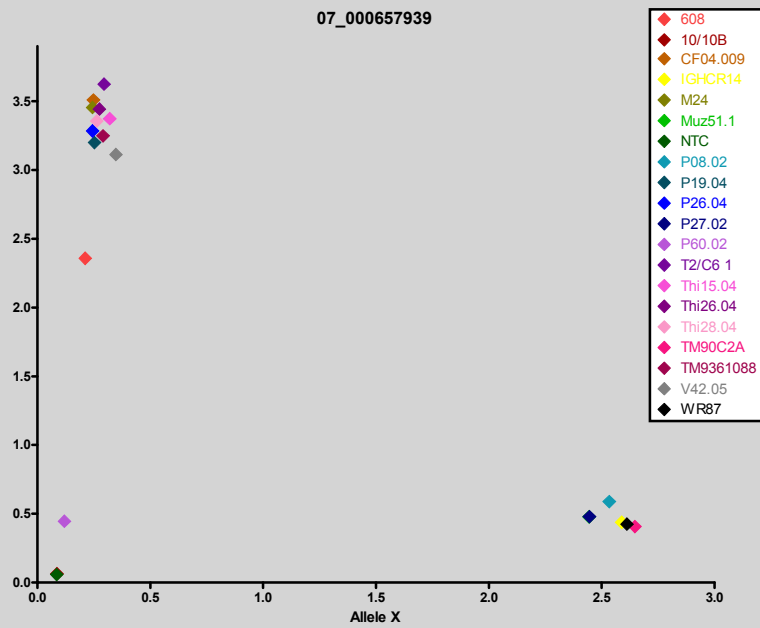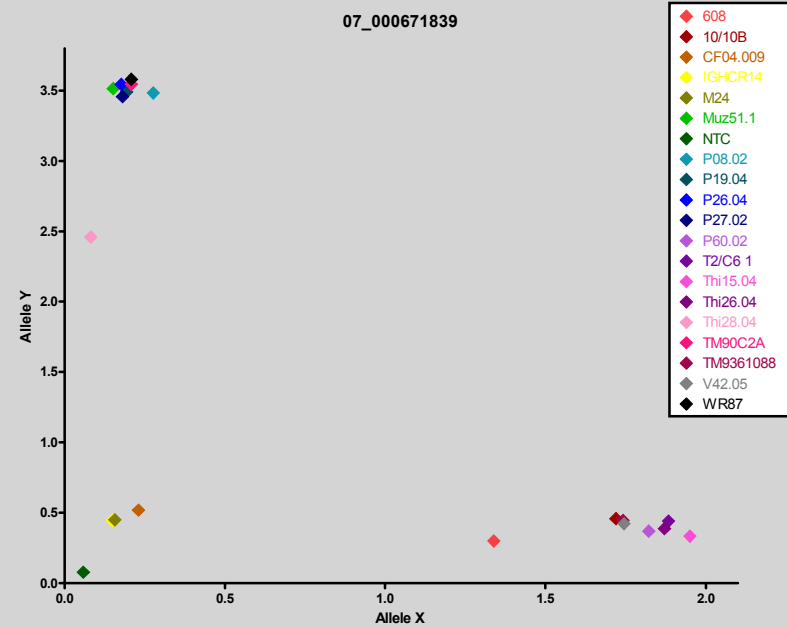

# Relative Intensities and Allelic Discrimination: Assay 13 - 16

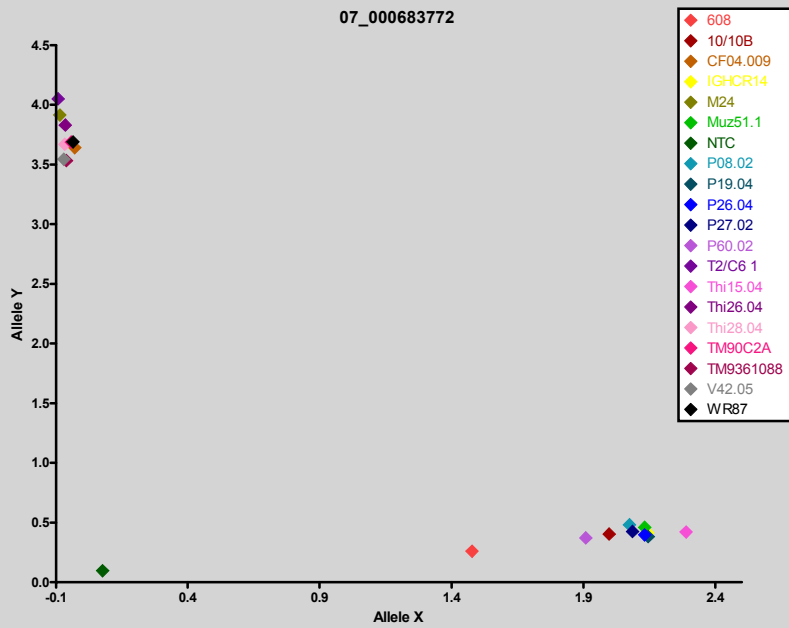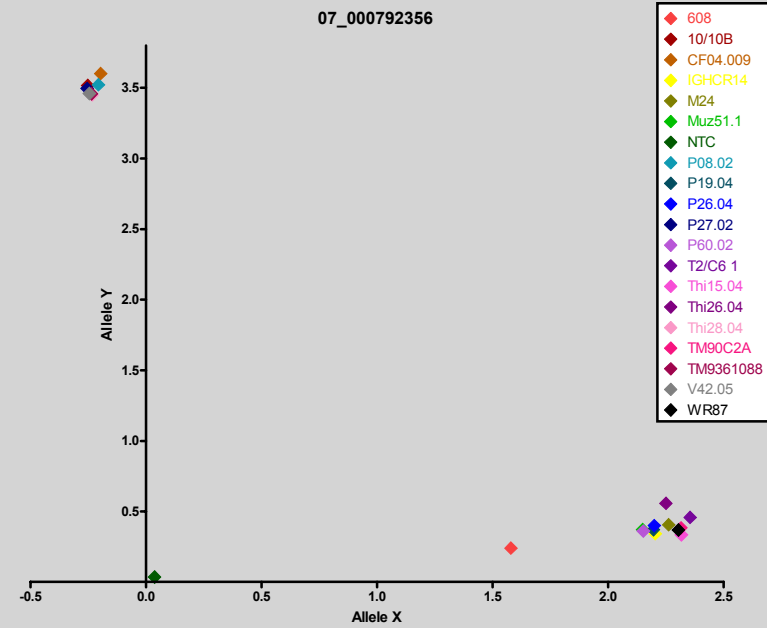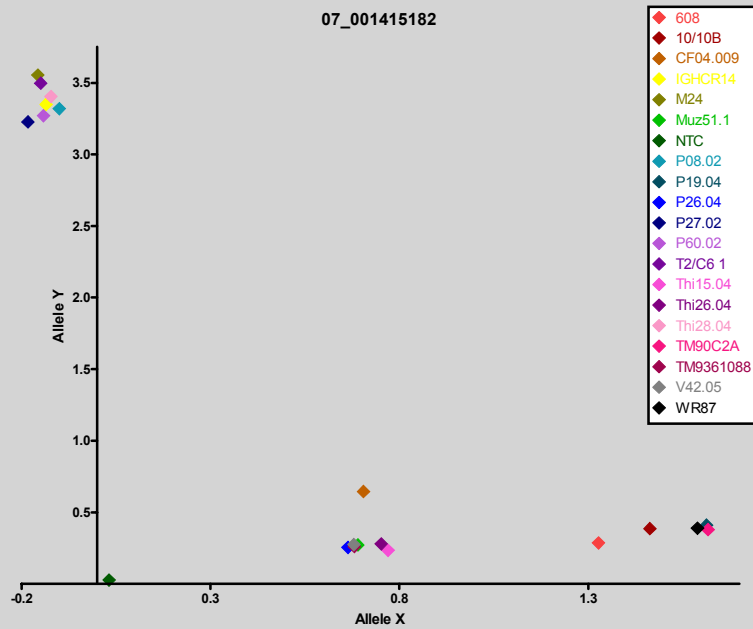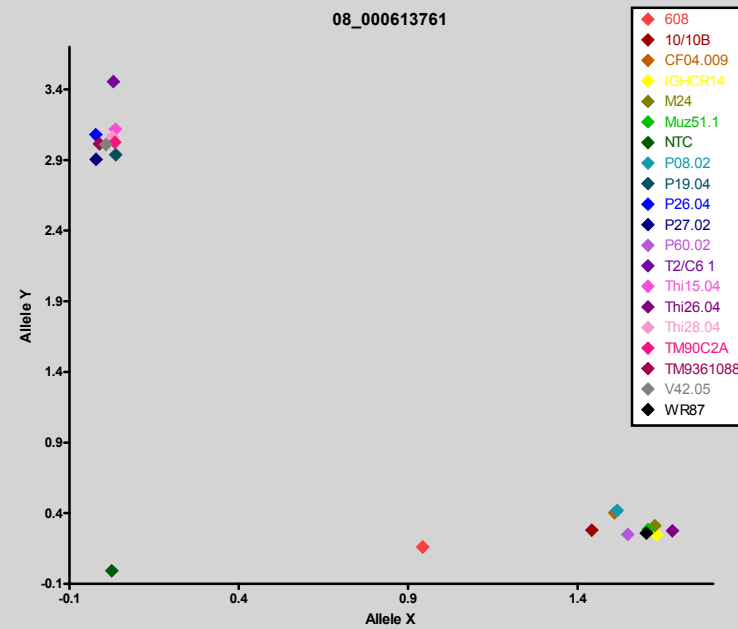

# Relative Intensities and Allelic Discrimination: Assay 17 - 20

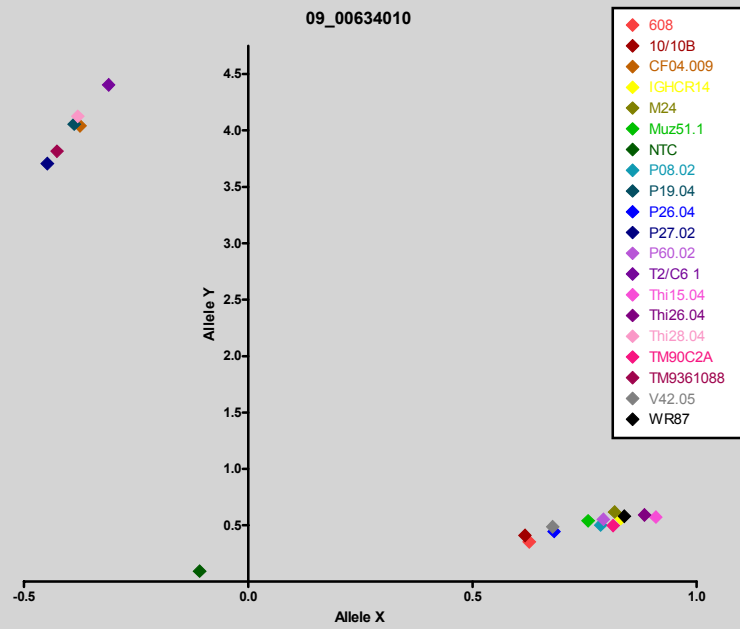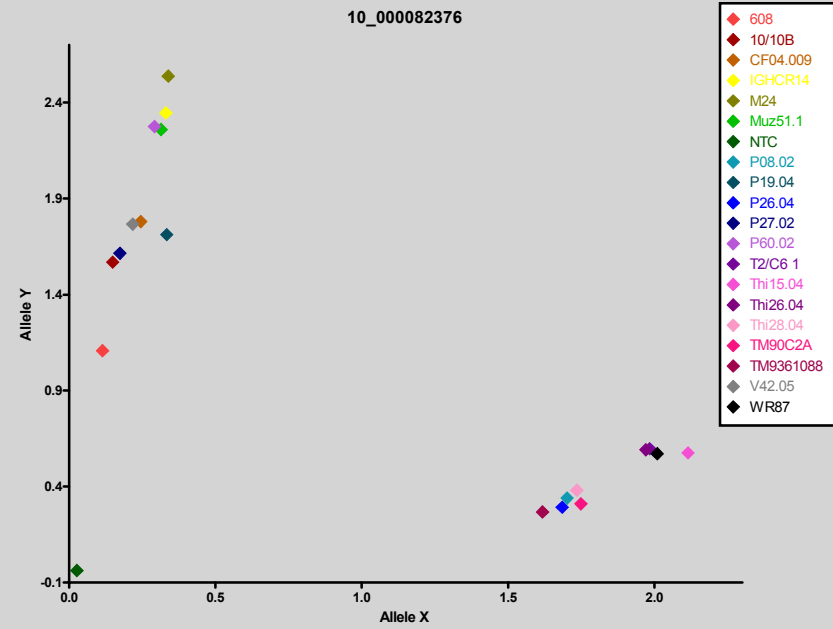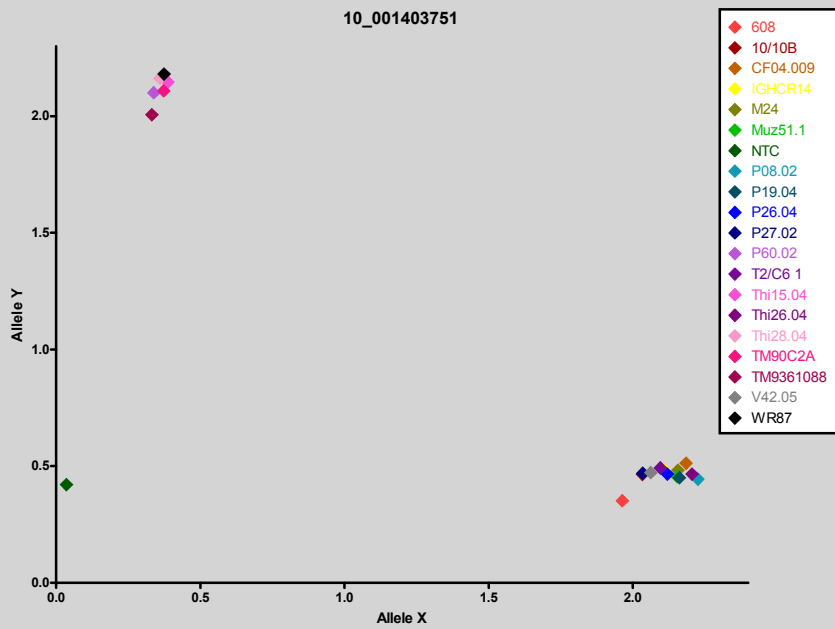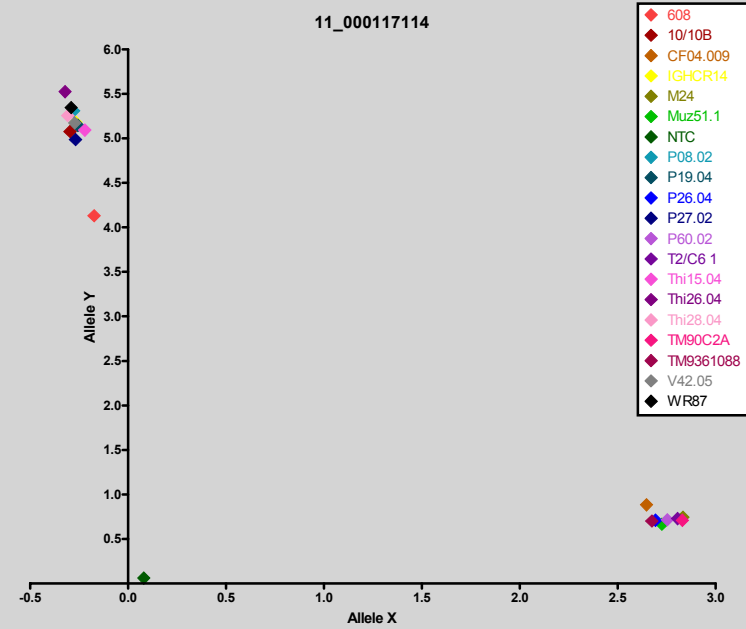

# Relative Intensities and Allelic Discrimination: Assay 21 - 24

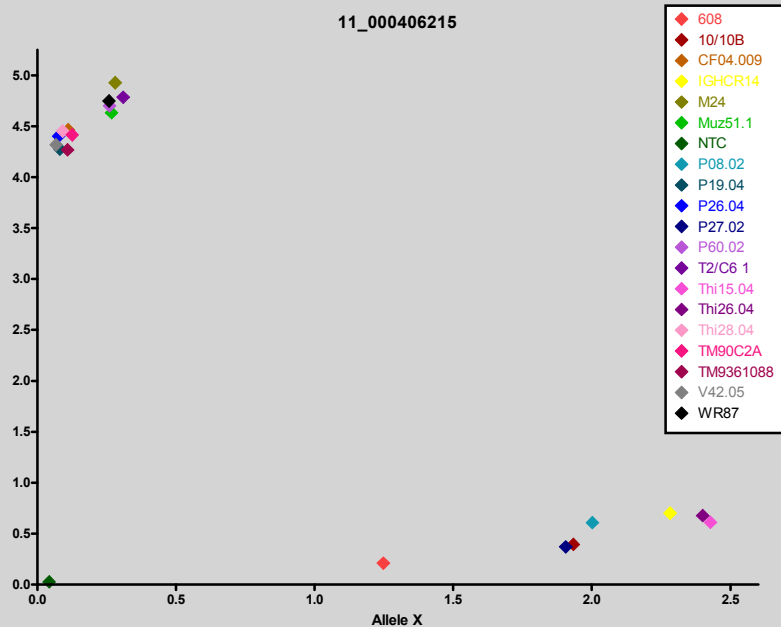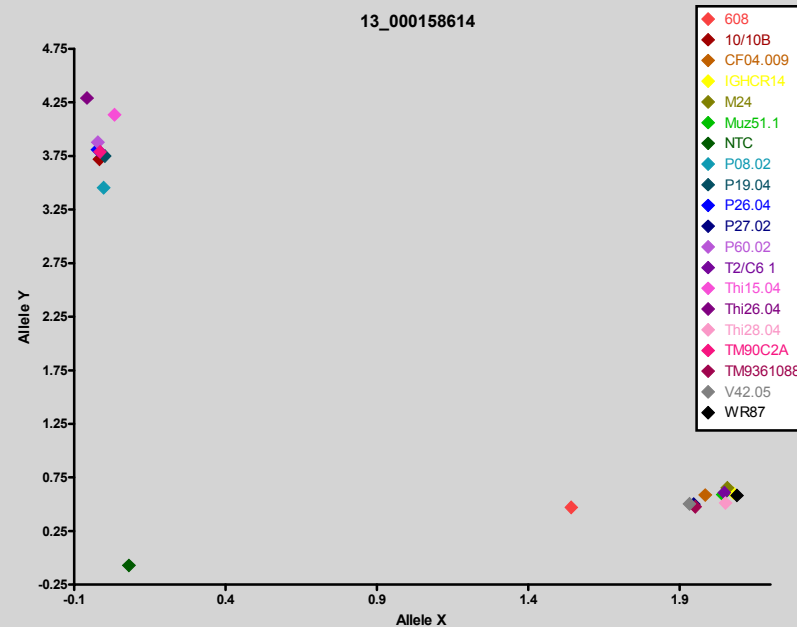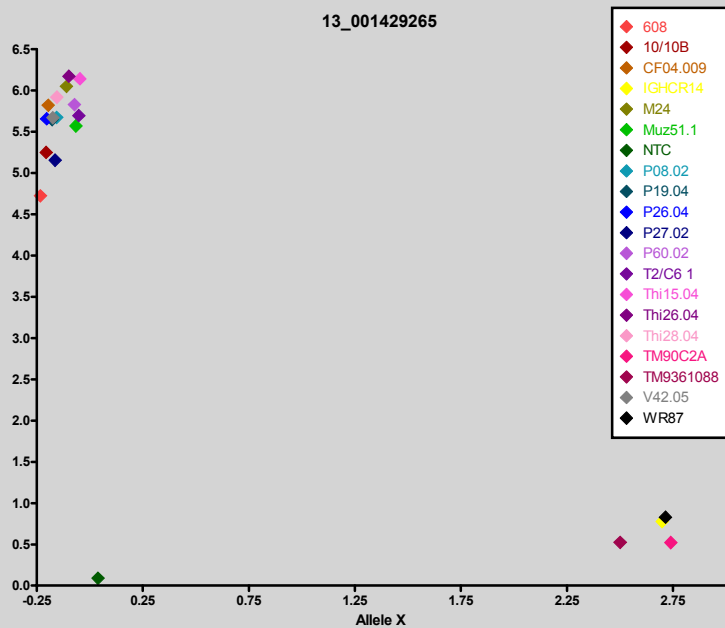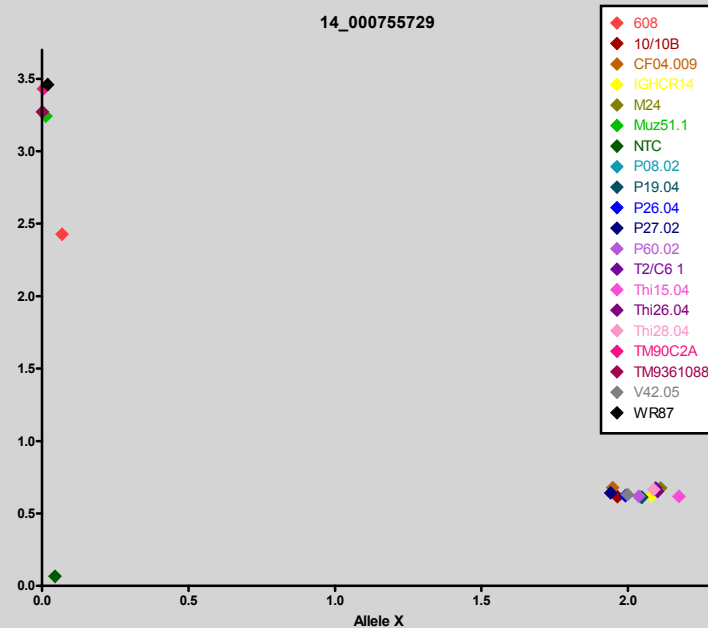

Supplement: MOESM6 [file 9548026]
